# Supplementary material for: The Effect of Sulfated (1→3)-α-L-Fucan from the Brown Alga Saccharina cichorioides Miyabe on Resveratrol-Induced Apoptosis in Colon Carcinoma Cells
Source: MDPI journal article supplement (doi:10.3390/md11010194), 2013-01-21
Supplement: s1 [file s1]

  corina  07071423193D 1   1.00000     0.00000 
CORINA 3.49 0023  12.04.2013
 33 35  0  0  1  0  0  0  0  0108 V2000
   -0.2513    0.5628   -2.0815 C   0  0  0  0  0  0  0  0  0  0  0  0
    0.8787    1.4214   -1.5512 C   0  0  0  0  0  0  0  0  0  0  0  0
    2.1644    1.0171   -2.2846 C   0  0  0  0  0  0  0  0  0  0  0  0
    2.3390   -0.5004   -2.1862 C   0  0  0  0  0  0  0  0  0  0  0  0
    1.2364   -1.1569   -2.8137 O   0  0  0  0  0  0  0  0  0  0  0  0
   -0.0215   -0.9310   -2.1685 C   0  0  0  0  0  0  0  0  0  0  0  0
    3.5523   -0.8822   -2.8376 O   0  0  0  0  0  0  0  0  0  0  0  0
    4.4744   -2.7921   -4.0026 C   0  0  0  0  0  0  0  0  0  0  0  0
    3.8787   -2.2659   -2.6937 C   0  0  0  0  0  0  0  0  0  0  0  0
    4.9146   -2.4363   -1.5788 C   0  0  0  0  0  0  0  0  0  0  0  0
    6.1908   -1.6859   -1.9675 C   0  0  0  0  0  0  0  0  0  0  0  0
    6.6769   -2.1906   -3.2129 O   0  0  0  0  0  0  0  0  0  0  0  0
    5.7667   -2.0287   -4.3026 C   0  0  0  0  0  0  0  0  0  0  0  0
    5.9035   -0.2921   -2.0974 O   0  0  0  0  0  0  0  0  0  0  0  0
    6.6835    1.7491   -3.1370 C   0  0  0  0  0  0  0  0  0  0  0  0
    7.0594    0.5233   -2.2998 C   0  0  0  0  0  0  0  0  0  0  0  0
    7.5966    0.9982   -0.9467 C   0  0  0  0  0  0  0  0  0  0  0  0
    6.5280    1.8525   -0.2601 C   0  0  0  0  0  0  0  0  0  0  0  0
    6.1889    2.9554   -1.1032 O   0  0  0  0  0  0  0  0  0  0  0  0
    5.6483    2.5759   -2.3704 C   0  0  0  0  0  0  0  0  0  0  0  0
    5.3637    1.0589   -0.0219 O   0  0  0  0  0  0  0  0  0  0  0  0
    0.5948    2.8000   -1.7979 O   0  0  0  0  0  0  0  0  0  0  0  0
   -0.1248    3.4429   -0.7440 C   0  0  0  0  0  0  0  0  0  0  0  0
    4.3425    1.7322    0.7168 C   0  0  0  0  0  0  0  0  0  0  0  0
    0.0059   -1.5311   -0.7613 C   0  0  0  0  0  0  0  0  0  0  0  0
    6.3995   -2.5793   -5.5822 C   0  0  0  0  0  0  0  0  0  0  0  0
    5.3010    3.8308   -3.1736 C   0  0  0  0  0  0  0  0  0  0  0  0
    7.9244   -0.2133   -0.0717 C   0  0  0  0  0  0  0  0  0  0  0  0
   -1.5582    1.1760   -2.5139 C   0  0  0  0  0  0  0  0  0  0  0  0
    2.0650    1.4265   -3.7555 C   0  0  0  0  0  0  0  0  0  0  0  0
    3.4764   -2.5781   -5.1423 C   0  0  0  0  0  0  0  0  0  0  0  0
    6.0899    1.2953   -4.4722 C   0  0  0  0  0  0  0  0  0  0  0  0
    4.3607   -1.8632   -0.2728 C   0  0  0  0  0  0  0  0  0  0  0  0
  4  5  1  0  0  0  0
  5  6  1  0  0  0  0
  6  1  1  0  0  0  0
  4  7  1  0  0  0  0
 11 12  1  0  0  0  0
 12 13  1  0  0  0  0
 13  8  1  0  0  0  0
  7  9  1  0  0  0  0
 11 14  1  0  0  0  0
 18 19  1  0  0  0  0
 19 20  1  0  0  0  0
 20 15  1  0  0  0  0
 14 16  1  0  0  0  0
 18 21  1  0  0  0  0
  2 22  1  0  0  0  0
 22 23  1  0  0  0  0
 21 24  1  0  0  0  0
  6 25  1  0  0  0  0
 13 26  1  0  0  0  0
 20 27  1  0  0  0  0
  1  2  1  0  0  0  0
  3  2  1  0  0  0  0
  8  9  1  0  0  0  0
 10  9  1  0  0  0  0
  4  3  1  0  0  0  0
 11 10  1  0  0  0  0
 15 16  1  0  0  0  0
 17 16  1  0  0  0  0
 18 17  1  0  0  0  0
 17 28  1  0  0  0  0
  1 29  1  0  0  0  0
  3 30  1  0  0  0  0
  8 31  1  0  0  0  0
 15 32  1  0  0  0  0
 10 33  1  0  0  0  0
A   23
R
A   24
R
A   28
OSO3-
M  ZZJ  28 
M  ZZJ  28   ACD/Labs07081410522D
M  ZZJ  28 
M  ZZJ  28   5  4  0  0  0  0  0  0  0  0  2 V2000
M  ZZJ  28     5.8450   -1.4046    0.0000 O   0  0  0  0  0  0  0  0  0  0  0  0
M  ZZJ  28     5.1800   -2.5565    0.0000 S   0  0  0  0  0  0  0  0  0  0  0  0
M  ZZJ  28     6.3318   -3.2215    0.0000 O   0  0  0  0  0  0  0  0  0  0  0  0
M  ZZJ  28     4.0281   -1.8915    0.0000 O   0  0  0  0  0  0  0  0  0  0  0  0
M  ZZJ  28     4.5150   -3.7083    0.0000 O   0  5  0  0  0  0  0  0  0  0  0  0
M  ZZJ  28   1  2  1  0  0  0  0
M  ZZJ  28   2  3  2  0  0  0  0
M  ZZJ  28   2  4  2  0  0  0  0
M  ZZJ  28   2  5  1  0  0  0  0
M  ZZJ  28 M  CHG  1   5  -1
M  ZZJ  28 M  END
A   29
OSO3-
M  ZZJ  29 
M  ZZJ  29   ACD/Labs07081410522D
M  ZZJ  29 
M  ZZJ  29   5  4  0  0  0  0  0  0  0  0  2 V2000
M  ZZJ  29    -6.7810    1.8915    0.0000 O   0  0  0  0  0  0  0  0  0  0  0  0
M  ZZJ  29    -5.6291    2.5565    0.0000 S   0  0  0  0  0  0  0  0  0  0  0  0
M  ZZJ  29    -6.2941    3.7083    0.0000 O   0  0  0  0  0  0  0  0  0  0  0  0
M  ZZJ  29    -4.9641    1.4046    0.0000 O   0  0  0  0  0  0  0  0  0  0  0  0
M  ZZJ  29    -4.4774    3.2215    0.0000 O   0  5  0  0  0  0  0  0  0  0  0  0
M  ZZJ  29   1  2  1  0  0  0  0
M  ZZJ  29   2  3  2  0  0  0  0
M  ZZJ  29   2  4  2  0  0  0  0
M  ZZJ  29   2  5  1  0  0  0  0
M  ZZJ  29 M  CHG  1   5  -1
M  ZZJ  29 M  END
A   30
OSO3-
M  ZZJ  30 
M  ZZJ  30   ACD/Labs07081410522D
M  ZZJ  30 
M  ZZJ  30   5  4  0  0  0  0  0  0  0  0  2 V2000
M  ZZJ  30    -4.1631   -1.4046    0.0000 O   0  0  0  0  0  0  0  0  0  0  0  0
M  ZZJ  30    -4.8281   -2.5565    0.0000 S   0  0  0  0  0  0  0  0  0  0  0  0
M  ZZJ  30    -3.6764   -3.2215    0.0000 O   0  0  0  0  0  0  0  0  0  0  0  0
M  ZZJ  30    -5.9799   -1.8915    0.0000 O   0  0  0  0  0  0  0  0  0  0  0  0
M  ZZJ  30    -5.4931   -3.7083    0.0000 O   0  5  0  0  0  0  0  0  0  0  0  0
M  ZZJ  30   1  2  1  0  0  0  0
M  ZZJ  30   2  3  2  0  0  0  0
M  ZZJ  30   2  4  2  0  0  0  0
M  ZZJ  30   2  5  1  0  0  0  0
M  ZZJ  30 M  CHG  1   5  -1
M  ZZJ  30 M  END
A   31
OSO3-
M  ZZJ  31 
M  ZZJ  31   ACD/Labs07081410522D
M  ZZJ  31 
M  ZZJ  31   5  4  0  0  0  0  0  0  0  0  2 V2000
M  ZZJ  31    -1.8932    1.8915    0.0000 O   0  0  0  0  0  0  0  0  0  0  0  0
M  ZZJ  31    -0.7416    2.5565    0.0000 S   0  0  0  0  0  0  0  0  0  0  0  0
M  ZZJ  31    -1.4066    3.7083    0.0000 O   0  0  0  0  0  0  0  0  0  0  0  0
M  ZZJ  31    -0.0766    1.4046    0.0000 O   0  0  0  0  0  0  0  0  0  0  0  0
M  ZZJ  31     0.4103    3.2215    0.0000 O   0  5  0  0  0  0  0  0  0  0  0  0
M  ZZJ  31   1  2  1  0  0  0  0
M  ZZJ  31   2  3  2  0  0  0  0
M  ZZJ  31   2  4  2  0  0  0  0
M  ZZJ  31   2  5  1  0  0  0  0
M  ZZJ  31 M  CHG  1   5  -1
M  ZZJ  31 M  END
A   32
OSO3-
M  ZZJ  32 
M  ZZJ  32   ACD/Labs07081410522D
M  ZZJ  32 
M  ZZJ  32   5  4  0  0  0  0  0  0  0  0  2 V2000
M  ZZJ  32     3.2271    1.8915    0.0000 O   0  0  0  0  0  0  0  0  0  0  0  0
M  ZZJ  32     4.3789    2.5565    0.0000 S   0  0  0  0  0  0  0  0  0  0  0  0
M  ZZJ  32     3.7140    3.7083    0.0000 O   0  0  0  0  0  0  0  0  0  0  0  0
M  ZZJ  32     5.0439    1.4046    0.0000 O   0  0  0  0  0  0  0  0  0  0  0  0
M  ZZJ  32     5.5308    3.2215    0.0000 O   0  5  0  0  0  0  0  0  0  0  0  0
M  ZZJ  32   1  2  1  0  0  0  0
M  ZZJ  32   2  3  2  0  0  0  0
M  ZZJ  32   2  4  2  0  0  0  0
M  ZZJ  32   2  5  1  0  0  0  0
M  ZZJ  32 M  CHG  1   5  -1
M  ZZJ  32 M  END
A   33
OSO3-
M  ZZJ  33 
M  ZZJ  33   ACD/Labs07081410522D
M  ZZJ  33 
M  ZZJ  33   5  4  0  0  0  0  0  0  0  0  2 V2000
M  ZZJ  33     0.7245   -1.4046    0.0000 O   0  0  0  0  0  0  0  0  0  0  0  0
M  ZZJ  33     0.0595   -2.5565    0.0000 S   0  0  0  0  0  0  0  0  0  0  0  0
M  ZZJ  33     1.2113   -3.2215    0.0000 O   0  0  0  0  0  0  0  0  0  0  0  0
M  ZZJ  33    -1.0922   -1.8915    0.0000 O   0  0  0  0  0  0  0  0  0  0  0  0
M  ZZJ  33    -0.6055   -3.7083    0.0000 O   0  5  0  0  0  0  0  0  0  0  0  0
M  ZZJ  33   1  2  1  0  0  0  0
M  ZZJ  33   2  3  2  0  0  0  0
M  ZZJ  33   2  4  2  0  0  0  0
M  ZZJ  33   2  5  1  0  0  0  0
M  ZZJ  33 M  CHG  1   5  -1
M  ZZJ  33 M  END
M  ZZE  3  22  23  24  23  28  23
M  END
$$$$
