# Supplementary material for: The Effect of Sulfated (1→3)-α-L-Fucan from the Brown Alga Saccharina cichorioides Miyabe on Resveratrol-Induced Apoptosis in Colon Carcinoma Cells
Source: MDPI journal article supplement (doi:10.3390/md11010194), 2013-01-21
Supplement: s2 [file s2]

  ACD/Labs07081410522D

 33 35  0  0  1  0  0  0  0  0108 V2000
   13.0902   -4.7426    0.0000 C   0  0  0  0  0  0  0  0  0  0  0  0
   13.7552   -5.8945    0.0000 C   0  0  0  0  0  0  0  0  0  0  0  0
   15.0418   -5.5574    0.0000 C   0  0  0  0  0  0  0  0  0  0  0  0
   16.3207   -5.8945    0.0000 C   0  0  0  0  0  0  0  0  0  0  0  0
   15.6557   -4.7426    0.0000 O   0  0  0  0  0  0  0  0  0  0  0  0
   14.3691   -5.0796    0.0000 C   0  0  0  0  0  0  0  0  0  0  0  0
   17.4724   -5.2295    0.0000 O   0  0  0  0  0  0  0  0  0  0  0  0
   17.9779   -4.7426    0.0000 C   0  0  0  0  0  0  0  0  0  0  0  0
   18.6429   -5.8945    0.0000 C   0  0  0  0  0  0  0  0  0  0  0  0
   19.9295   -5.5574    0.0000 C   0  0  0  0  0  0  0  0  0  0  0  0
   21.2082   -5.8945    0.0000 C   0  0  0  0  0  0  0  0  0  0  0  0
   20.5434   -4.7426    0.0000 O   0  0  0  0  0  0  0  0  0  0  0  0
   19.2566   -5.0796    0.0000 C   0  0  0  0  0  0  0  0  0  0  0  0
   22.3601   -5.2295    0.0000 O   0  0  0  0  0  0  0  0  0  0  0  0
   23.0984   -4.7426    0.0000 C   0  0  0  0  0  0  0  0  0  0  0  0
   23.7634   -5.8945    0.0000 C   0  0  0  0  0  0  0  0  0  0  0  0
   25.0500   -5.5574    0.0000 C   0  0  0  0  0  0  0  0  0  0  0  0
   26.3288   -5.8945    0.0000 C   0  0  0  0  0  0  0  0  0  0  0  0
   25.6638   -4.7426    0.0000 O   0  0  0  0  0  0  0  0  0  0  0  0
   24.3771   -5.0796    0.0000 C   0  0  0  0  0  0  0  0  0  0  0  0
   27.4806   -5.2295    0.0000 O   0  0  0  0  0  0  0  0  0  0  0  0
   12.4707   -5.5503    0.0000 O   0  0  0  0  0  0  0  0  0  0  0  0
   11.3188   -6.2153    0.0000 C   0  0  0  0  0  0  0  0  0  0  0  0
   28.4209   -6.1698    0.0000 C   0  0  0  0  0  0  0  0  0  0  0  0
   14.7133   -3.7949    0.0000 C   0  0  0  0  0  0  0  0  0  0  0  0
   19.9216   -3.9279    0.0000 C   0  0  0  0  0  0  0  0  0  0  0  0
   25.0421   -3.9279    0.0000 C   0  0  0  0  0  0  0  0  0  0  0  0
   25.7149   -6.7086    0.0000 C   0  0  0  0  0  0  0  0  0  0  0  0
   13.0889   -3.4125    0.0000 C   0  0  0  0  0  0  0  0  0  0  0  0
   15.7068   -6.7086    0.0000 C   0  0  0  0  0  0  0  0  0  0  0  0
   17.9766   -3.4125    0.0000 C   0  0  0  0  0  0  0  0  0  0  0  0
   23.0970   -3.4125    0.0000 C   0  0  0  0  0  0  0  0  0  0  0  0
   20.5944   -6.7086    0.0000 C   0  0  0  0  0  0  0  0  0  0  0  0
  4  5  1  0  0  0  0
  5  6  1  0  0  0  0
  6  1  1  0  0  0  0
  4  7  1  0  0  0  0
 11 12  1  0  0  0  0
 12 13  1  0  0  0  0
 13  8  1  0  0  0  0
  7  9  1  0  0  0  0
 11 14  1  0  0  0  0
 18 19  1  0  0  0  0
 19 20  1  0  0  0  0
 20 15  1  0  0  0  0
 14 16  1  0  0  0  0
 18 21  1  0  0  0  0
  2 22  1  0  0  0  0
 22 23  1  6  0  0  0
 21 24  1  6  0  0  0
  6 25  1  0  0  0  0
 13 26  1  0  0  0  0
 20 27  1  0  0  0  0
  1  2  1  1  0  0  0
  3  2  1  1  0  0  0
  8  9  1  1  0  0  0
 10  9  1  1  0  0  0
  4  3  1  1  0  0  0
 11 10  1  1  0  0  0
 15 16  1  1  0  0  0
 17 16  1  1  0  0  0
 18 17  1  1  0  0  0
 17 28  1  0  0  0  0
  1 29  1  0  0  0  0
  3 30  1  0  0  0  0
  8 31  1  0  0  0  0
 15 32  1  0  0  0  0
 10 33  1  0  0  0  0
A   23
R
A   24
R
A   28
OSO3-
M  ZZJ  28 
M  ZZJ  28   ACD/Labs07081410522D
M  ZZJ  28 
M  ZZJ  28   5  4  0  0  0  0  0  0  0  0  2 V2000
M  ZZJ  28     5.8450   -1.4046    0.0000 O   0  0  0  0  0  0  0  0  0  0  0  0
M  ZZJ  28     5.1800   -2.5565    0.0000 S   0  0  0  0  0  0  0  0  0  0  0  0
M  ZZJ  28     6.3318   -3.2215    0.0000 O   0  0  0  0  0  0  0  0  0  0  0  0
M  ZZJ  28     4.0281   -1.8915    0.0000 O   0  0  0  0  0  0  0  0  0  0  0  0
M  ZZJ  28     4.5150   -3.7083    0.0000 O   0  5  0  0  0  0  0  0  0  0  0  0
M  ZZJ  28   1  2  1  0  0  0  0
M  ZZJ  28   2  3  2  0  0  0  0
M  ZZJ  28   2  4  2  0  0  0  0
M  ZZJ  28   2  5  1  0  0  0  0
M  ZZJ  28 M  CHG  1   5  -1
M  ZZJ  28 M  END
A   29
OSO3-
M  ZZJ  29 
M  ZZJ  29   ACD/Labs07081410522D
M  ZZJ  29 
M  ZZJ  29   5  4  0  0  0  0  0  0  0  0  2 V2000
M  ZZJ  29    -6.7810    1.8915    0.0000 O   0  0  0  0  0  0  0  0  0  0  0  0
M  ZZJ  29    -5.6291    2.5565    0.0000 S   0  0  0  0  0  0  0  0  0  0  0  0
M  ZZJ  29    -6.2941    3.7083    0.0000 O   0  0  0  0  0  0  0  0  0  0  0  0
M  ZZJ  29    -4.9641    1.4046    0.0000 O   0  0  0  0  0  0  0  0  0  0  0  0
M  ZZJ  29    -4.4774    3.2215    0.0000 O   0  5  0  0  0  0  0  0  0  0  0  0
M  ZZJ  29   1  2  1  0  0  0  0
M  ZZJ  29   2  3  2  0  0  0  0
M  ZZJ  29   2  4  2  0  0  0  0
M  ZZJ  29   2  5  1  0  0  0  0
M  ZZJ  29 M  CHG  1   5  -1
M  ZZJ  29 M  END
A   30
OSO3-
M  ZZJ  30 
M  ZZJ  30   ACD/Labs07081410522D
M  ZZJ  30 
M  ZZJ  30   5  4  0  0  0  0  0  0  0  0  2 V2000
M  ZZJ  30    -4.1631   -1.4046    0.0000 O   0  0  0  0  0  0  0  0  0  0  0  0
M  ZZJ  30    -4.8281   -2.5565    0.0000 S   0  0  0  0  0  0  0  0  0  0  0  0
M  ZZJ  30    -3.6764   -3.2215    0.0000 O   0  0  0  0  0  0  0  0  0  0  0  0
M  ZZJ  30    -5.9799   -1.8915    0.0000 O   0  0  0  0  0  0  0  0  0  0  0  0
M  ZZJ  30    -5.4931   -3.7083    0.0000 O   0  5  0  0  0  0  0  0  0  0  0  0
M  ZZJ  30   1  2  1  0  0  0  0
M  ZZJ  30   2  3  2  0  0  0  0
M  ZZJ  30   2  4  2  0  0  0  0
M  ZZJ  30   2  5  1  0  0  0  0
M  ZZJ  30 M  CHG  1   5  -1
M  ZZJ  30 M  END
A   31
OSO3-
M  ZZJ  31 
M  ZZJ  31   ACD/Labs07081410522D
M  ZZJ  31 
M  ZZJ  31   5  4  0  0  0  0  0  0  0  0  2 V2000
M  ZZJ  31    -1.8932    1.8915    0.0000 O   0  0  0  0  0  0  0  0  0  0  0  0
M  ZZJ  31    -0.7416    2.5565    0.0000 S   0  0  0  0  0  0  0  0  0  0  0  0
M  ZZJ  31    -1.4066    3.7083    0.0000 O   0  0  0  0  0  0  0  0  0  0  0  0
M  ZZJ  31    -0.0766    1.4046    0.0000 O   0  0  0  0  0  0  0  0  0  0  0  0
M  ZZJ  31     0.4103    3.2215    0.0000 O   0  5  0  0  0  0  0  0  0  0  0  0
M  ZZJ  31   1  2  1  0  0  0  0
M  ZZJ  31   2  3  2  0  0  0  0
M  ZZJ  31   2  4  2  0  0  0  0
M  ZZJ  31   2  5  1  0  0  0  0
M  ZZJ  31 M  CHG  1   5  -1
M  ZZJ  31 M  END
A   32
OSO3-
M  ZZJ  32 
M  ZZJ  32   ACD/Labs07081410522D
M  ZZJ  32 
M  ZZJ  32   5  4  0  0  0  0  0  0  0  0  2 V2000
M  ZZJ  32     3.2271    1.8915    0.0000 O   0  0  0  0  0  0  0  0  0  0  0  0
M  ZZJ  32     4.3789    2.5565    0.0000 S   0  0  0  0  0  0  0  0  0  0  0  0
M  ZZJ  32     3.7140    3.7083    0.0000 O   0  0  0  0  0  0  0  0  0  0  0  0
M  ZZJ  32     5.0439    1.4046    0.0000 O   0  0  0  0  0  0  0  0  0  0  0  0
M  ZZJ  32     5.5308    3.2215    0.0000 O   0  5  0  0  0  0  0  0  0  0  0  0
M  ZZJ  32   1  2  1  0  0  0  0
M  ZZJ  32   2  3  2  0  0  0  0
M  ZZJ  32   2  4  2  0  0  0  0
M  ZZJ  32   2  5  1  0  0  0  0
M  ZZJ  32 M  CHG  1   5  -1
M  ZZJ  32 M  END
A   33
OSO3-
M  ZZJ  33 
M  ZZJ  33   ACD/Labs07081410522D
M  ZZJ  33 
M  ZZJ  33   5  4  0  0  0  0  0  0  0  0  2 V2000
M  ZZJ  33     0.7245   -1.4046    0.0000 O   0  0  0  0  0  0  0  0  0  0  0  0
M  ZZJ  33     0.0595   -2.5565    0.0000 S   0  0  0  0  0  0  0  0  0  0  0  0
M  ZZJ  33     1.2113   -3.2215    0.0000 O   0  0  0  0  0  0  0  0  0  0  0  0
M  ZZJ  33    -1.0922   -1.8915    0.0000 O   0  0  0  0  0  0  0  0  0  0  0  0
M  ZZJ  33    -0.6055   -3.7083    0.0000 O   0  5  0  0  0  0  0  0  0  0  0  0
M  ZZJ  33   1  2  1  0  0  0  0
M  ZZJ  33   2  3  2  0  0  0  0
M  ZZJ  33   2  4  2  0  0  0  0
M  ZZJ  33   2  5  1  0  0  0  0
M  ZZJ  33 M  CHG  1   5  -1
M  ZZJ  33 M  END
M  ZZE  3  22  23  24  23  28  23
M  END
